# Supplementary material
Source: Springer Nature journal article supplement (https://www.springermedizin.de/resource/supplementary/13058_2010_2552_MOESM3_ESM.pdf/9701678)

**TAX followed by FEC**

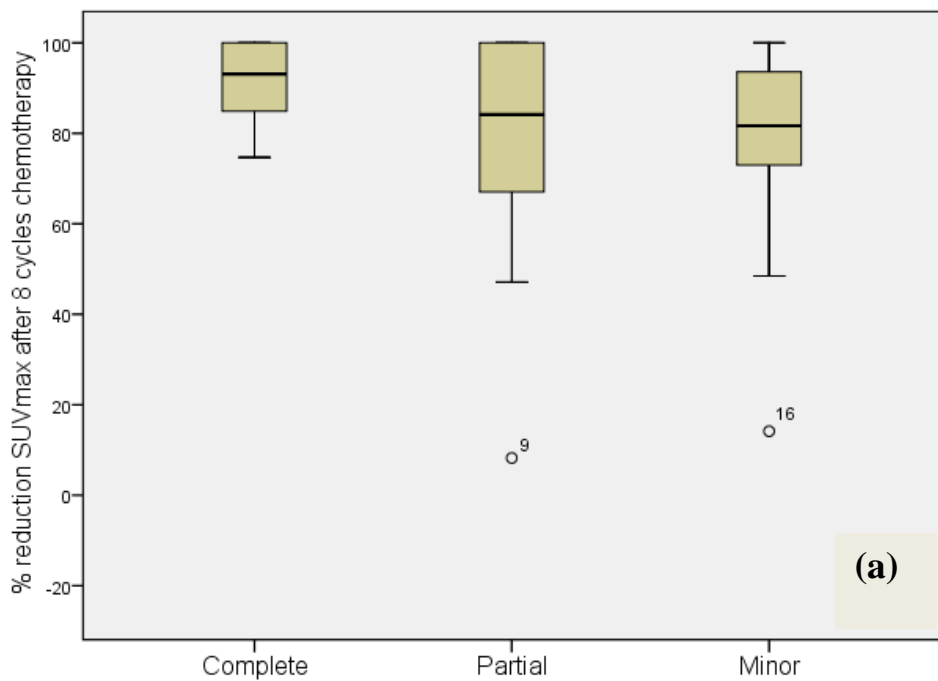

**FEC followed by TAX**

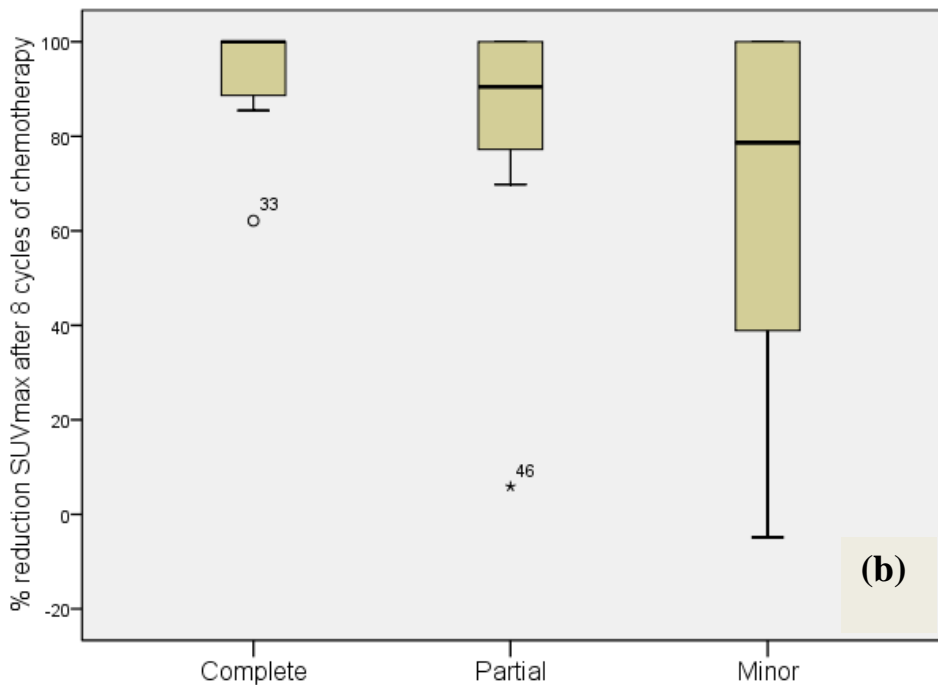

Supplement: MOESM3 [file 9701678]
